# Supplementary material for: High density lath twins lead to high thermoelectric conversion efficiency in Bi2Te3 modules
Source: Royal Society of Chemistry journal article supplement (doi:10.1039/d4mh00977k), 2024-10-15
Supplement: d4mh00977k1.pdf [file d4mh00977k1.pdf]

**Supporting Information:**

**High Dense Lath Twins Upgrade High Thermoelectric Efficiency in  $\text{Bi}_2\text{Te}_3$**

**Modules**

Qianqian Sun<sup>1,2,†</sup>, Gang Wu<sup>1,2,†</sup>, Xiaojian Tan<sup>1,2,\*</sup>, Qiang Zhang<sup>1,2,\*</sup>, Zhe Guo<sup>1</sup>, Qiaoyan Pan<sup>1,2</sup>, Guoqiang Liu<sup>1,2</sup>, Peng Sun<sup>1</sup>, Jiehua Wu<sup>1</sup>, Jun Jiang<sup>1,2,\*</sup>

<sup>1</sup> Ningbo Institute of Materials Technology and Engineering, Chinese Academy of Sciences, Ningbo 315201, China

<sup>2</sup> University of Chinese Academy of Sciences, Beijing 100049, China

\*Corresponding author. E-mail: tanxiaojian@nimte.ac.cn, qiangzhang@nimte.ac.cn, jjun@nimte.ac.cn

† These authors contribute equally.

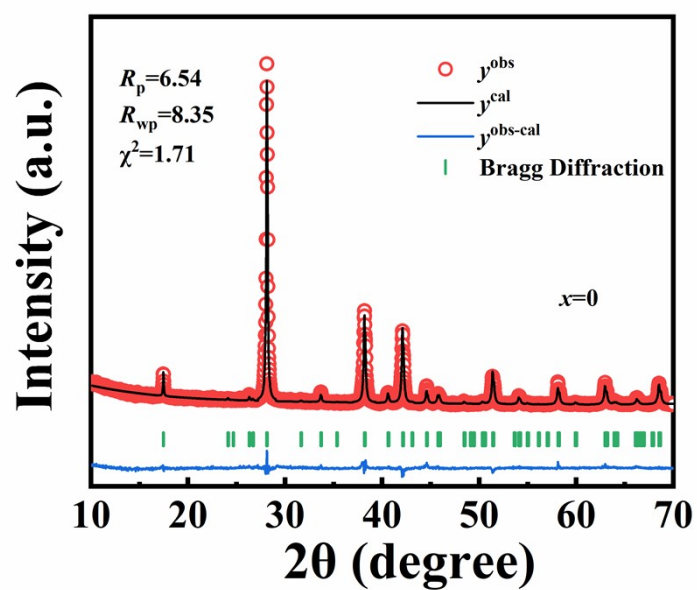

Figure S1. Rietveld refined XRD patterns of  $x = 0$  at room temperature.

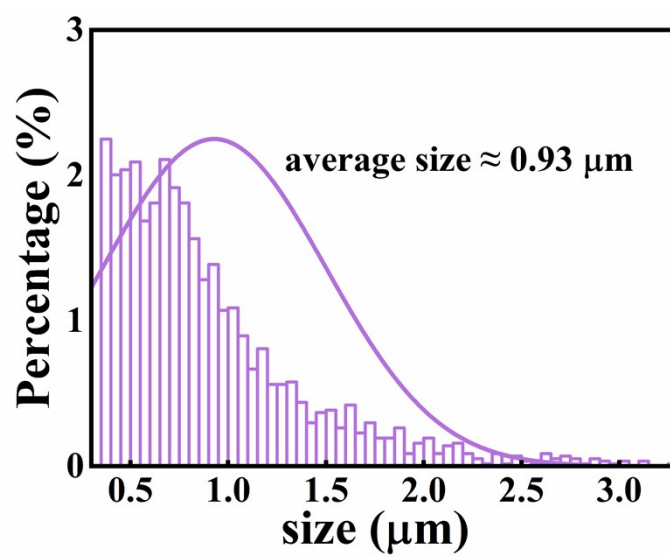

Figure S2. The distributions of crystallite size for  $x = 0.03$  sample.

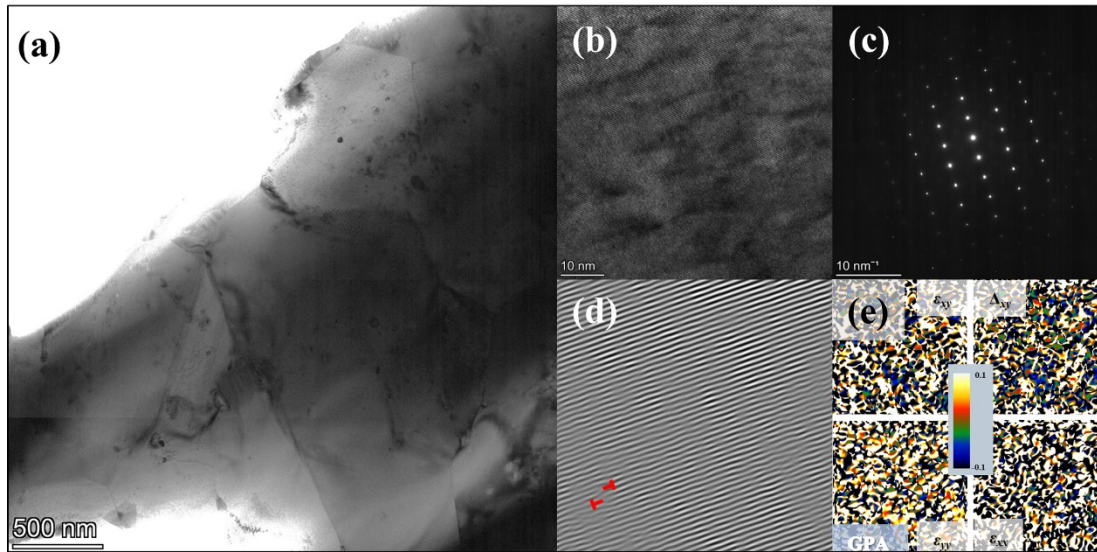

**Figure S3.** Analysis of microscopic morphology of undoped sample by TEM. (a) Low-resolution and (b) high-resolution TEM images of  $\text{Bi}_{0.4}\text{Sb}_{1.6}\text{Te}_3$  matrix. (c) The electron diffraction pattern for (b). (d) The inverse fast Fourier transformation image and (e) the geometric phase analysis image for (b) to indicate the dislocations and stress-strain distribution.

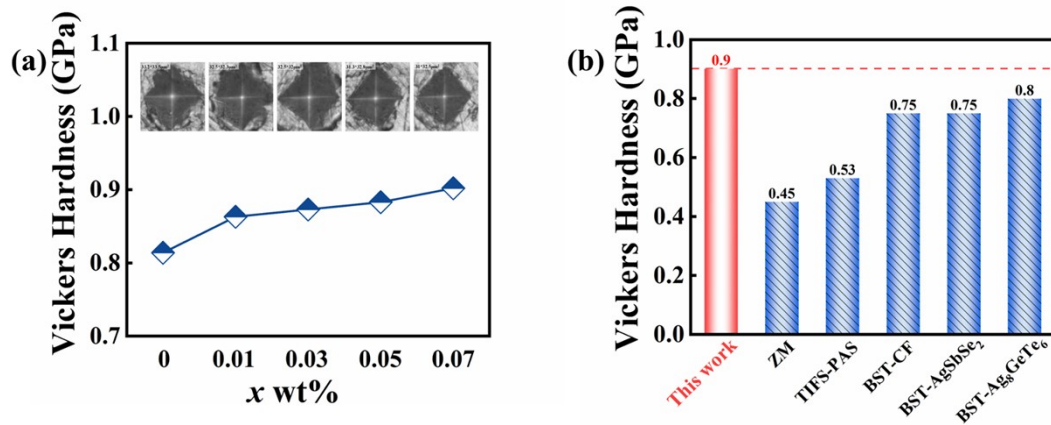

**Figure S4.** The characterization of Vickers microhardness. (a) The Vickers microhardness of  $\text{Ag}_9\text{GaTe}_6$ -doped  $\text{Bi}_{0.4}\text{Sb}_{1.6}\text{Te}_3$  samples and (b) some literature data are shown for comparison.<sup>1-4</sup>

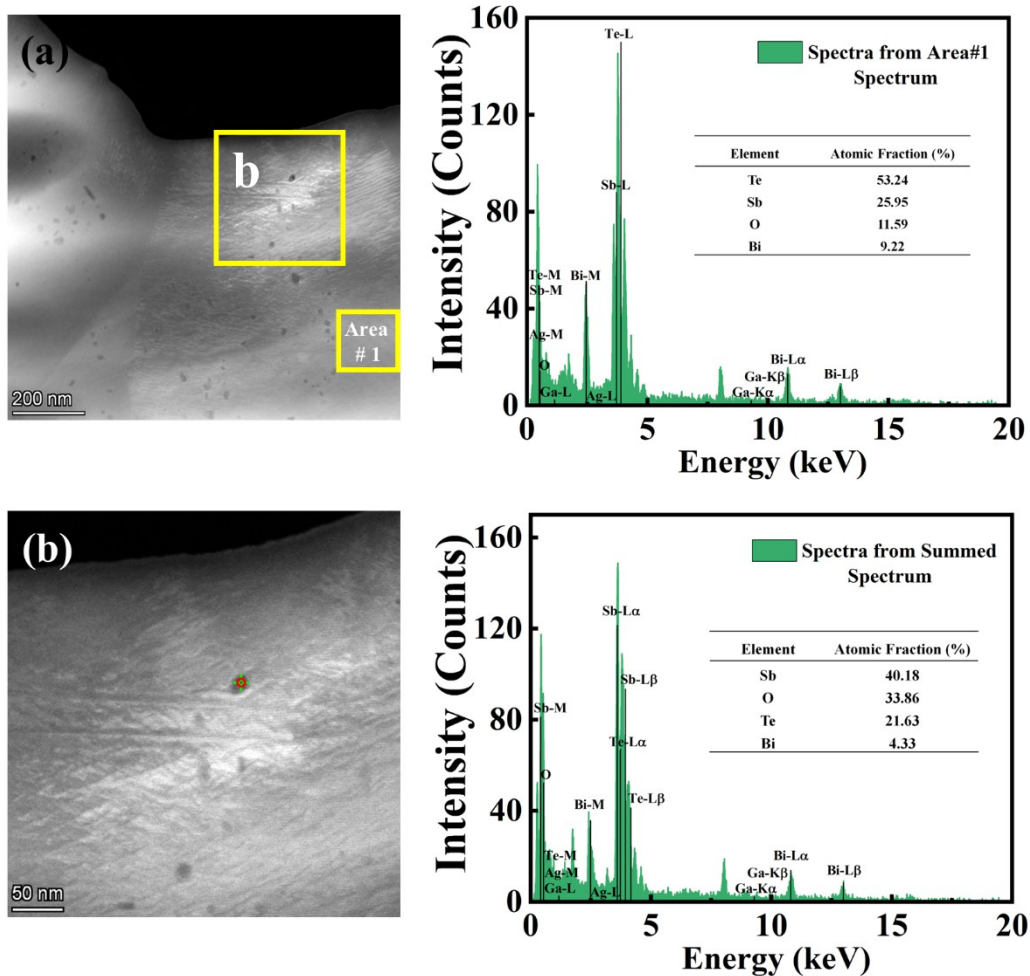

**Figure S5.** High-angle annular dark-field (HAADF) image without impurity to get the actual atomic fraction of  $\text{Bi}_{0.4}\text{Sb}_{1.6}\text{Te}_3 + 0.03 \text{ wt\% Ag}_9\text{GaTe}_6$ , blank area#1 in (a) and nano-particles of (b).

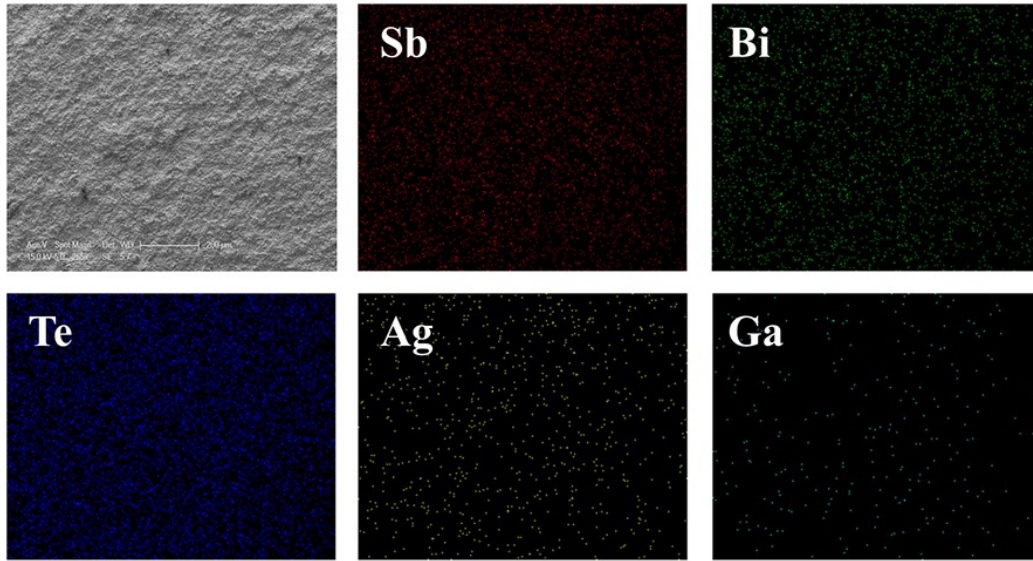

**Figure S6.** The  $\text{Bi}_{0.4}\text{Sb}_{1.6}\text{Te}_3 + 0.03 \text{ wt\% Ag}_9\text{GaTe}_6$  sample's EDS elemental mapping of Bi, Sb, Te, Ag and Ga elements.

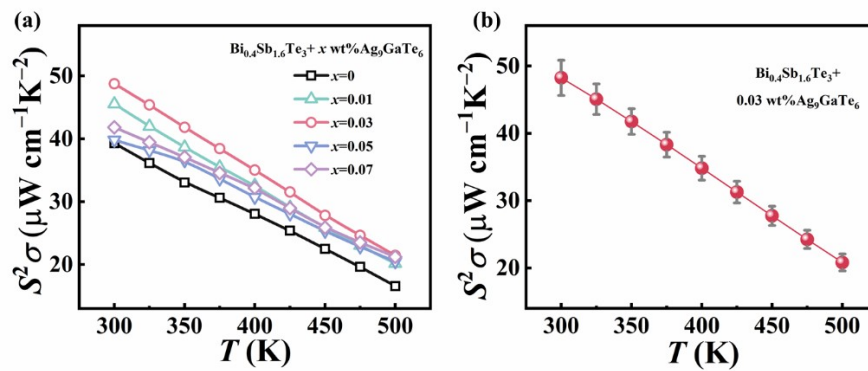

**Figure S7.** Temperature dependence of power factor for  $\text{Bi}_{0.4}\text{Sb}_{1.6}\text{Te}_3 + x \text{ wt\% Ag}_9\text{GaTe}_6$  samples.

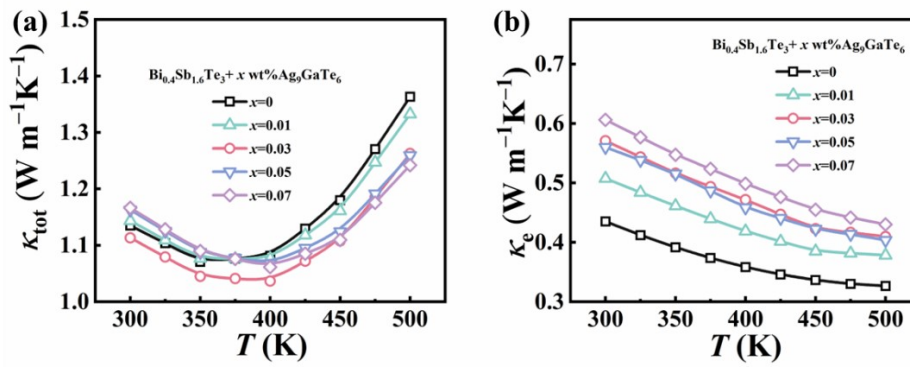

**Figure S8.** Temperature dependence of a) total thermal conductivity and b) electronic thermal conductivity for  $\text{Bi}_{0.4}\text{Sb}_{1.6}\text{Te}_3 + x \text{ wt}\% \text{Ag}_9\text{GaTe}_6$  samples.

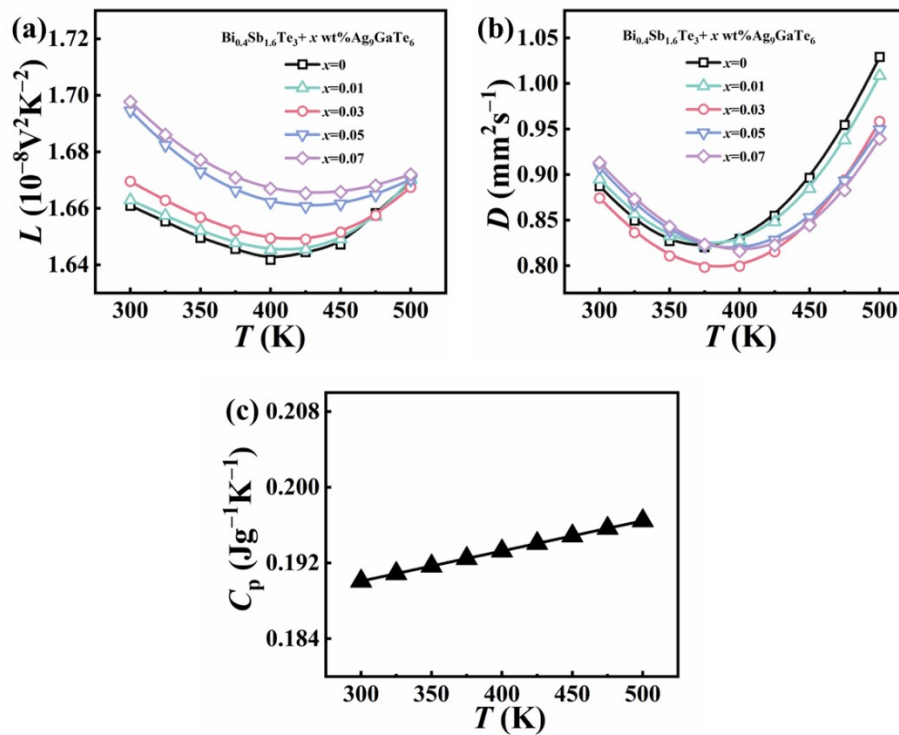

**Figure S9.** The measured (a) calculated Lorenz number  $L$ , (b) thermal diffusivity  $D$ , and (c) the heat capacity  $C_p$  of the  $\text{Bi}_{0.4}\text{Sb}_{1.6}\text{Te}_3 + x \text{ wt}\% \text{Ag}_9\text{GaTe}_6$  samples.

**Table S1.** The measured density  $\rho$  for the  $\text{Bi}_{0.4}\text{Sb}_{1.6}\text{Te}_3 + x \text{ wt\% Ag}_9\text{GaTe}_6$  samples.

| $x$                          | 0     | 0.01   | 0.03  | 0.05  | 0.07  |
|------------------------------|-------|--------|-------|-------|-------|
| $\rho$ (g cm <sup>-3</sup> ) | 6.742 | 6.7415 | 6.714 | 6.746 | 6.731 |

**Debye-Callaway model**

The contribution of different defects to lattice thermal conductivity of the  $\text{Bi}_{0.4}\text{Sb}_{1.6}\text{Te}_3 + x \text{ wt\% Ag}_9\text{GaTe}_6$  can be further explained by Debye-Callaway model. And the lattice thermal conductivity  $\kappa_l$  can be expressed as follows.<sup>5,6</sup>

$$\kappa_l = \frac{k_B}{2\pi^2 v} \left( \frac{k_B T}{\hbar} \right)^3 \int_0^{\vartheta_D/T} \tau_{\text{tot}}(x) x^4 e^x e^x - 12 dx$$

The spectral lattice thermal conductivity ( $\kappa_s$ ) is in the integrand term.

$$\kappa_s = \frac{k_B}{2\pi^2 v} \left( \frac{k_B T}{\hbar} \right)^3 \frac{x^4 e^x}{\tau_{\text{tot}}^{-1}(x) (e^x - 1)^2}$$

In the expression,  $k_B$  is the Boltzmann constant,  $v$  is the in-plane average velocity of phonon,  $\hbar$  is the reduced Plank constant,  $x = \hbar\omega/k_B T$  ( $\omega$  indicates the phonon frequency) is the reduced phonon frequency,  $\vartheta_D$  is the Debye temperature, and  $\tau_{\text{tot}}$  is the total phonon scattering relaxation time, which can be obtained according to the Matthiessen rule, including phonon-phonon Umklapp scattering (U), grain boundary scattering (B), point defect scattering (PD), and dislocation scattering (D) consisting of dislocation strain scattering (DS) and dislocation cores scattering (DC).

$$\tau_{\text{tot}}^{-1} = \tau_U^{-1} + \tau_{\text{PD}}^{-1} + \tau_{\text{GB}}^{-1} + \tau_D^{-1} + \tau_{\text{SP}}^{-1}$$

The calculation of the relaxation time related to Umklapp phonon-phonon scattering ( $\tau_U$ ) can be calculated with the following equation.

$$\tau_U^{-1} = A_N \frac{2 k_B V^{1/3} \gamma^2 \omega^2 T}{(6\pi^2)^{1/3} M V^3}$$

$A_N$  is the pre-factor of Umklapp scattering time, which can be obtained by fitting in-plane transport parameters of the ZM sample.  $V$ ,  $\gamma$ , and  $M$  are the average atomic volume, Grüneisen parameter, and the average atomic mass, respectively.

The relaxation time associated with grain boundary phonon scattering ( $\tau_B$ ) is calculated from:

$$\tau_B^{-1} = \frac{v}{d}$$

in which  $v$  is in-plane average speed of sound and  $d$  is the average grain size. The grain boundary phonon scattering ( $\tau_{\text{PD}}$ ) is estimated by:

$$\tau_{\text{PD}}^{-1} = \frac{V \omega^4}{4\pi v^3} \Gamma$$

in which  $\Gamma$  is point defect scattering parameter and the expression is as follows.

$$\Gamma = x(1-x) \left[ \left( \frac{\Delta M}{M} \right)^2 + \frac{2}{9} \left\{ (G + 6.4\gamma) \frac{1+r}{1-r} \right\}^2 \left( \frac{\Delta a}{a} \right)^2 \right]$$

in which  $x$  is the fractional concentration of either of constituents.  $\Delta M$ ,  $G$ ,  $r$ , and  $\Delta a$  are difference in mass, parameter representing a ratio of fractional change of bulk modulus to that of local bond length, Poisson's ratio, and the difference in lattice constant, respectively.

The dislocation strain scattering ( $\tau_{DS}^{-1}$ ) and dislocation cores scattering ( $\tau_{DC}^{-1}$ ) are calculated by:

$$\tau_{DS}^{-1} = 0.6 B_D^2 N_D (\gamma + \Delta\gamma)^2 \omega \left\{ \frac{1}{2} + \frac{1}{24} \left( \frac{1-2r}{1-r} \right)^2 \left[ 1 + \sqrt{2} \left( \frac{u_L}{u_T} \right) \right]^2 \right\} + N_D \frac{V^{4/3}}{v^2} \omega^3$$

in which  $N_D$ ,  $B_D$ ,  $\gamma$ ,  $\Delta\gamma$ ,  $u_L$ ,  $u_T$  are dislocation density, effective Burger's vector, Grüneisen parameter, change in Grüneisen parameter, longitudinal phonon velocity, and transverse phonon velocity, respectively.

$$\gamma = \gamma_{\text{pure}} + \gamma_1$$

$$\gamma_1 = \frac{V_{\text{Sb}_2\text{Te}_3} C_0 K}{k_B T_a} (\gamma_{\text{pure}} \alpha^2 - \alpha \beta)$$

$$\alpha = \frac{V_{\text{Bi}_2\text{Te}_3} - V_{\text{Sb}_2\text{Te}_3}}{V_{\text{Sb}_2\text{Te}_3}}$$

$$\beta = \frac{M_{\text{Sb}_2\text{Te}_3} - M_{\text{Bi}_2\text{Te}_3}}{2M_{\text{Bi}_2\text{Te}_3}}$$

in which  $B_D$ ,  $N_D$ ,  $C_0$ ,  $K$ ,  $T_a$ ,  $\gamma_{\text{pure}}$  and  $\gamma_1$  is the Burger's vector, the dislocation density, the concentration of  $\text{Bi}_2\text{Te}_3$  in  $\text{Bi}_{0.4}\text{Sb}_{1.6}\text{Te}_3$ , the bulk modulus of  $\text{Bi}_2\text{Te}_3$ , the sintering temperature, the Grüneisen parameter and the change in Grüneisen parameter, respectively.



**Table S2.** Parameters for the lattice thermal conductivity of Bi<sub>2</sub>Te<sub>3</sub>-based materials in the Debye-Callaway model.

| Parameters    | Description                                                                                             | Values                                | Ref    |
|---------------|---------------------------------------------------------------------------------------------------------|---------------------------------------|--------|
| $\vartheta_D$ | Debye temperature                                                                                       | 94K                                   | 5      |
| $B_D$         | Effective Burger's vector                                                                               | 1.2×10 <sup>-9</sup> m                | fitted |
| $v_L$         | Longitudinal phonon velocity                                                                            | 2884m s <sup>-1</sup>                 | 7      |
| $v_T$         | Transverse phonon velocity                                                                              | 1780m s <sup>-1</sup>                 | 8      |
| $v$           | In-plane average velocity of phonon                                                                     | 2147m s <sup>-1</sup>                 | 8      |
| $\gamma$      | Grüneisen parameter                                                                                     | 2.33                                  | 8      |
| $r$           | Poisson's ratio                                                                                         | 0.24                                  | 9      |
| $V$           | Average atomic volume of Bi <sub>0.4</sub> Sb <sub>1.6</sub> Te <sub>3</sub>                            | 31.26Å <sup>3</sup>                   | 9      |
| $V_{BT}$      | Atomic volume of Bi <sub>2</sub> Te <sub>3</sub>                                                        | 3.40×10 <sup>-29</sup> m <sup>3</sup> |        |
| $V_{ST}$      | Atomic volume of Sb <sub>2</sub> Te <sub>3</sub>                                                        | 3.31×10 <sup>-29</sup> m <sup>3</sup> |        |
| $M_{BT}$      | Atomic mass of Bi <sub>2</sub> Te <sub>3</sub>                                                          | 2.79×10 <sup>-25</sup> kg             |        |
| $M_{ST}$      | Atomic mass of Sb <sub>2</sub> Te <sub>3</sub>                                                          | 2.07×10 <sup>-25</sup> kg             |        |
| $C_0$         | Concentration of Bi <sub>0.4</sub> Sb <sub>1.6</sub> Te <sub>3</sub> in Bi <sub>2</sub> Te <sub>3</sub> | 0.2                                   |        |
| $K$           | Bulk modulus                                                                                            | 44.8GPa                               | 8      |
| $T_a$         | Sample Sintering temperature                                                                            | 693K                                  | Exp.   |

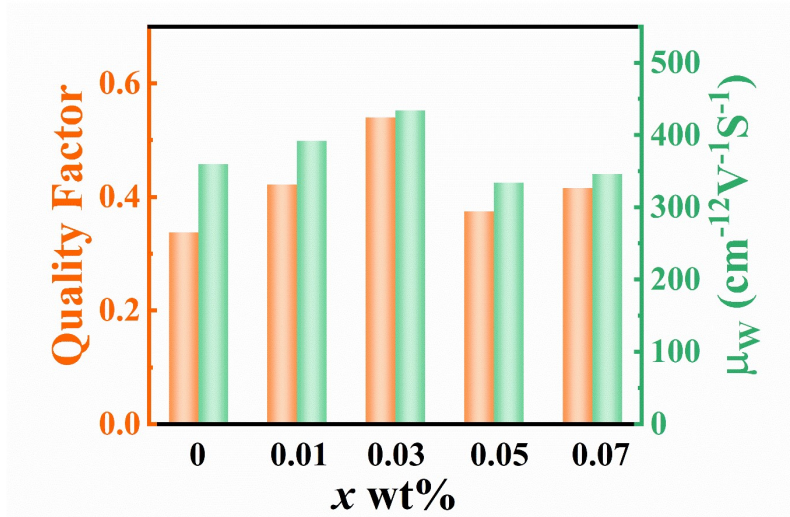

**Figure S10.** The variation of quality factor  $B$  and weighed mobility  $\mu_w$  of representative samples at room temperature.

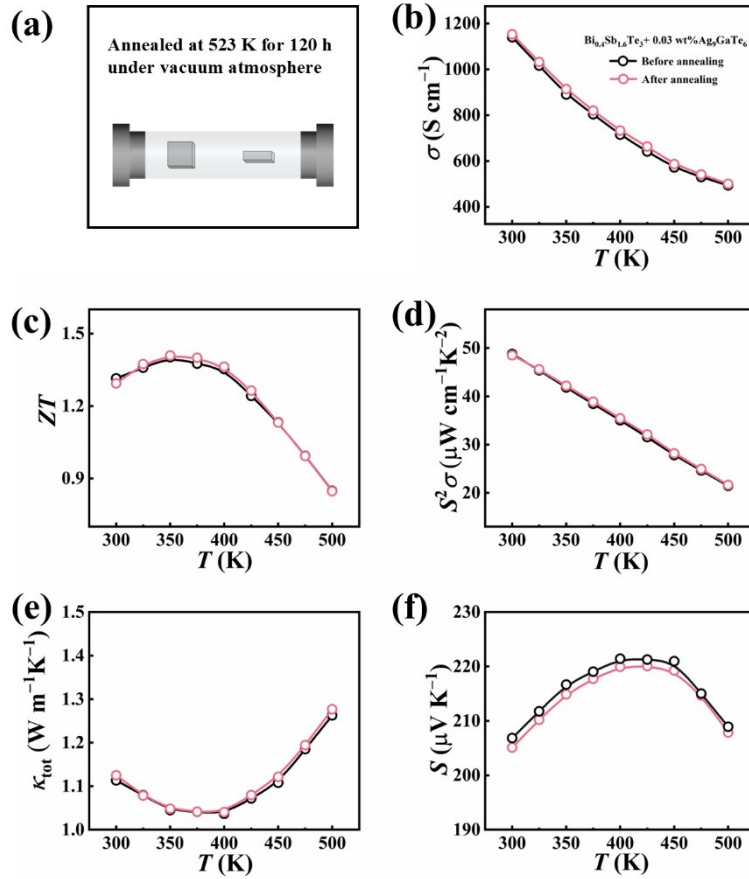

**Figure S11.** The anneal test of the  $\text{Bi}_{0.4}\text{Sb}_{1.6}\text{Te}_3 + 0.03 \text{ wt}\% \text{Ag}_9\text{GaTe}_6$  sample at 523 K for 120 h under vacuum atmosphere.

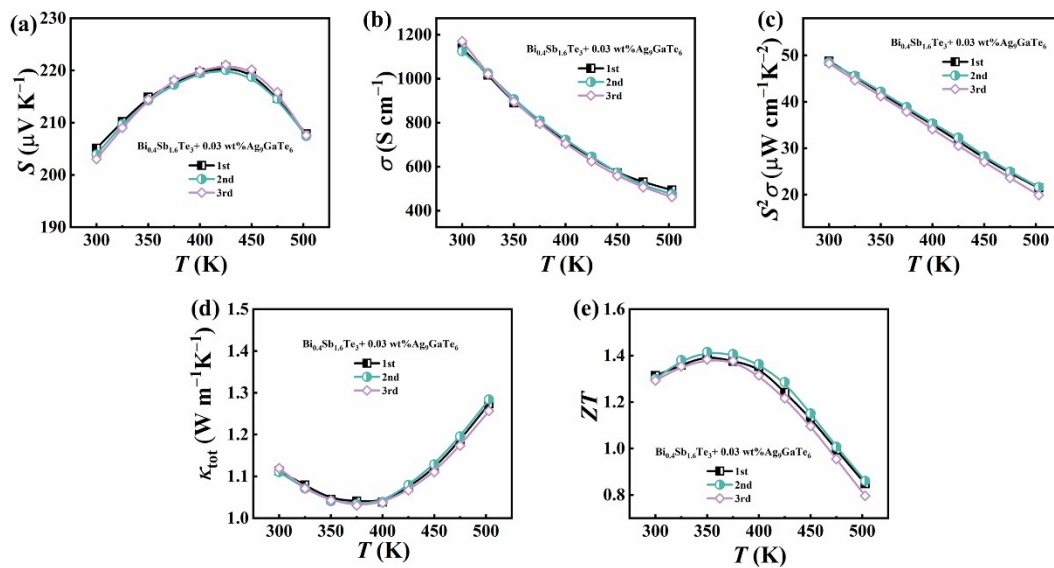

**Figure S12.** The repeatability test for thermoelectric performance of the  $\text{Bi}_{0.4}\text{Sb}_{1.6}\text{Te}_3 + 0.03 \text{ wt}\% \text{Ag}_9\text{GaTe}_6$  sample.

### Statistical analysis for materials:

The electronic and thermal transport parameters were measured by using the commercial ZEM-3 and LFA-457 instruments, respectively. The measured results hardly depend on the sample size, and the errors are mainly the standard deviations of these instruments. Specifically, the systematic errors of Seebeck coefficient  $S$  and electrical conductivity  $\sigma$  measurements are about 3% and 5%, respectively. The combined uncertainty for the total thermal conductivity  $\kappa_{tot}$  is about 7% calculated

from 
$$\frac{d\kappa_{tot}}{\kappa_{tot}} = \sqrt{\left(\frac{d\rho}{\rho}\right)^2 + \left(\frac{dC_p}{C_p}\right)^2 + \left(\frac{dD}{D}\right)^2}.$$
 1% for the density  $\rho$ , 5% for the specific heat  $C_p$ , and 5% for the thermal diffusion  $D$ . Ultimately, the uncertainty of the ZT value is estimated to be about 10%. The computational formula involved is

$$\frac{d(ZT)}{ZT} = \sqrt{\left(2 \times \frac{dS}{S}\right)^2 + \left(\frac{d\sigma}{\sigma}\right)^2 + \left(\frac{d\kappa_{tot}}{\kappa_{tot}}\right)^2}.$$

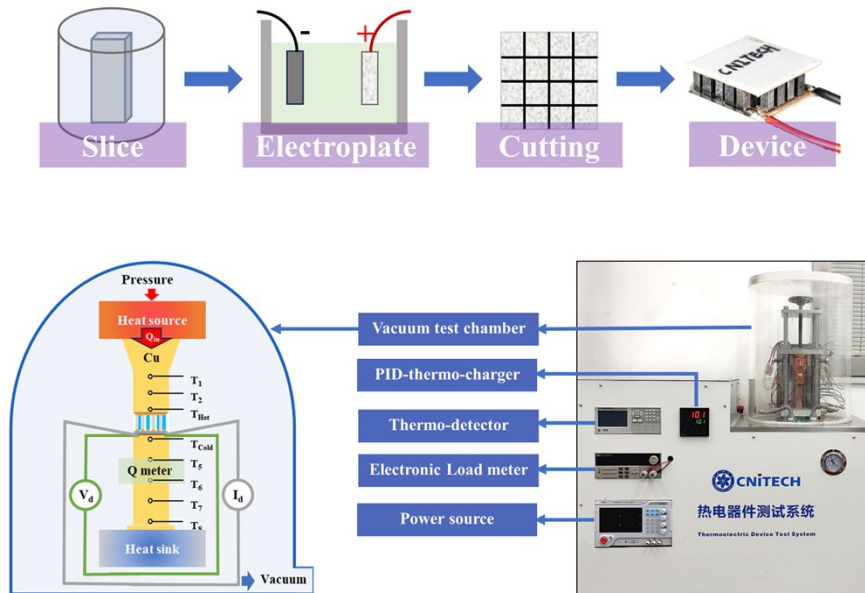

**Figure S12.** The flowchart of thermoelectric module preparation and the home-built testing system for the thermoelectric module conversion efficiency  $\eta$  measurement.

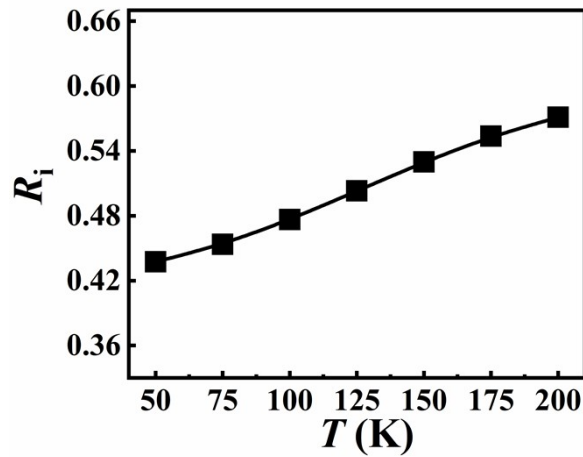

**Figure S13.** The internal resistance of the  $\text{Bi}_{0.4}\text{Sb}_{1.6}\text{Te}_3 + 0.03\text{wt}\% \text{Ag}_9\text{GaTe}_6$  sample.

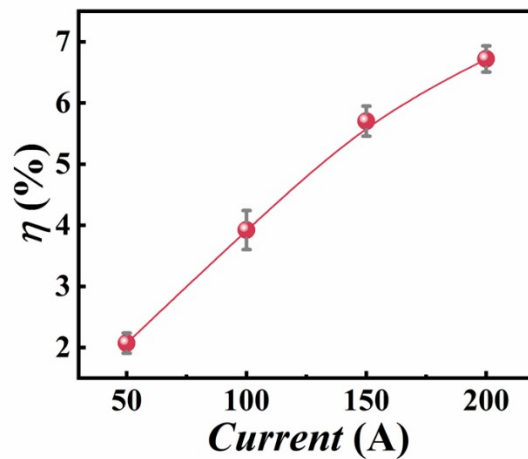

**Figure S14.** The conversion efficiency of remade  $\text{Bi}_2\text{Te}_3$ -based TE modules in the circuit.

#### Statistical analysis for modules:

The uncertainty in conversion efficiency is approximately 6%. The measurement error associated with conversion efficiency using the home-built instrument can be analyzed through standard error analysis and propagation methods. Specifically, the uncertainty in thermal conductivity measurements for copper is 5%, while the uncertainties for  $A_{\text{Cu}}$ ,  $l_{\text{Cu}}$ ,  $l$ ,  $U$  and  $T$  are 0.5%, 1.5%, 0.5%, 0.5%, and  $\pm 0.1\%$ , respectively. The uncertainty is calculated using the following equations:

$$\delta(\Delta T_{Cu}) = \sqrt{[T_{Cu1} \times \delta(T_{Cu1})]^2 + [T_{Cu2} \times \delta(T_{Cu2})]^2} / (T_{Cu1} - T_{Cu2})$$

$$\delta(Q) = \sqrt{\delta(\Delta T_{Cu})^2 + \delta(\kappa_{Cu})^2 + \delta(A_{Cu})^2 + \delta(l_{Cu})^2}$$

$$\delta(P) = \sqrt{\delta(I)^2 + \delta(U)^2}$$

$$\delta(P + Q) = \sqrt{[P \times \delta(P)]^2 + [Q \times \delta(Q)]^2} / (P + Q)$$

$$\delta(\eta) = \sqrt{\delta(P)^2 + \delta(P + Q)^2}$$

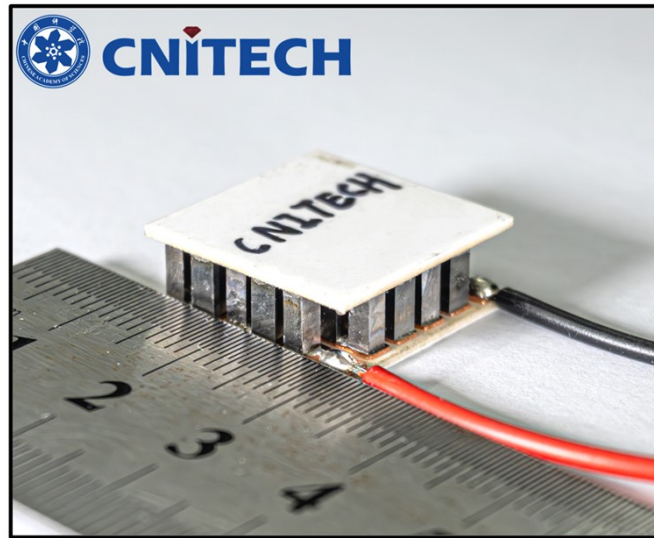

**Figure S15.** Optical images of the fabricated TE module composed of the *p*-type  $\text{Bi}_{0.4}\text{Sb}_{1.6}\text{Te}_3 + 0.03 \text{ wt\% Ag}_9\text{GaTe}_6$  and zone-melted *n*-type  $\text{Bi}_2\text{Te}_{2.7}\text{Se}_{0.3}$ .

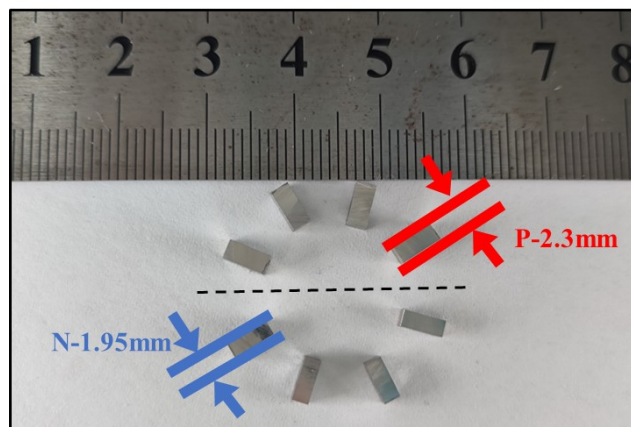

**Figure S16.** Comparison of geometric dimensions of the *n*/*p* type TE legs.

**Table S3.** The thermoelectric behaviors of *n*-type Bi<sub>2</sub>Te<sub>2.7</sub>Se<sub>0.3</sub> zone-melted materials in the thermoelectric modules.

| T (K) | $\sigma$ (S cm <sup>-1</sup> ) | S ( $\mu$ V K <sup>-1</sup> ) | $\kappa_{\text{tot}}$ (W m <sup>-1</sup> K <sup>-1</sup> ) |
|-------|--------------------------------|-------------------------------|------------------------------------------------------------|
| 300   | 1326                           | -201                          | 1.56                                                       |
| 350   | 1116                           | -211                          | 1.53                                                       |
| 400   | 948                            | -214                          | 1.65                                                       |
| 450   | 845                            | -204                          | 1.95                                                       |
| 500   | 807                            | -182                          | 2.38                                                       |

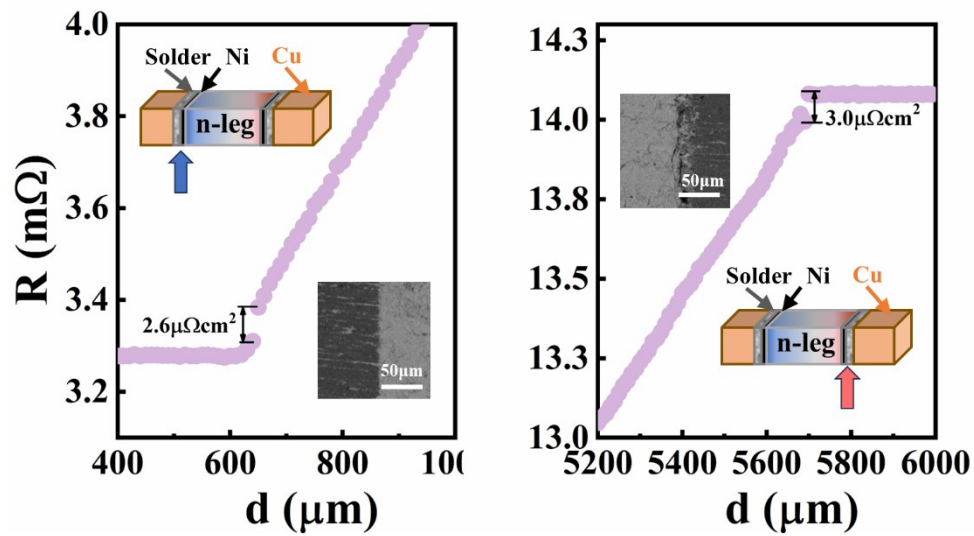

**Figure S17.** The measured contact resistance by the scanning of resistance across the Cu-Bi<sub>2</sub>Te<sub>3</sub> interfaces for *n*-leg, with the inset of SEM images.

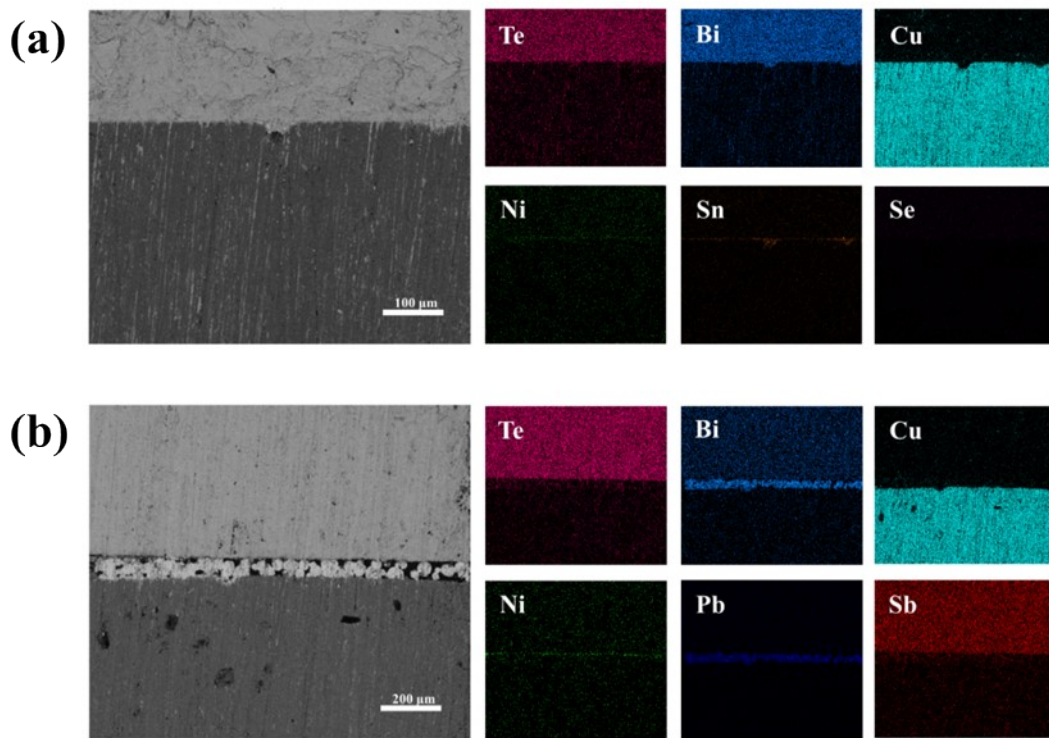

**Figure S18.** The SEM image and EDS mapping of the interface between Cu electrode and *p*-leg (a) cold-side, (b) hot-side.

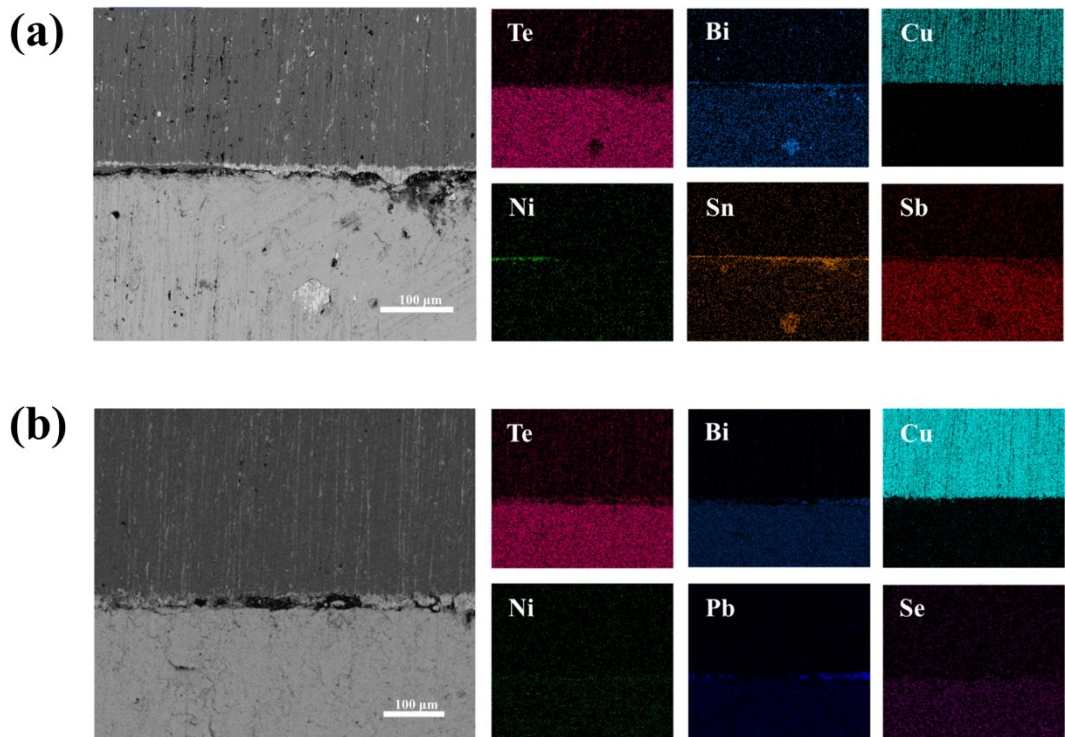

**Figure S19.** The SEM image and EDS mapping of the interface between Cu electrode and *n*-leg (a) cold-side, (b) hot-side.

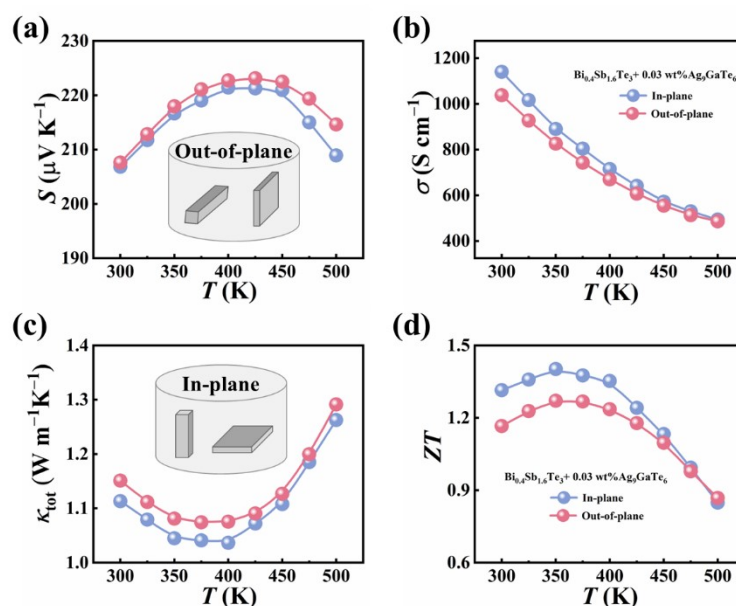

**Figure S19.** Comparison of electronic and thermal transport properties of the representative  $\text{Bi}_{0.4}\text{Sb}_{1.6}\text{Te}_3 + 0.03 \text{ wt\% Ag}_9\text{GaTe}_6$  sample in both the out-of-plane and in-plane directions, including a) Seebeck coefficient, b) electrical conductivity, c) total thermal conductivity, and d) ZT value.

### The synthesis method of $\text{Ag}_9\text{GaTe}_6$

The  $\text{Ag}_9\text{GaTe}_6$  polycrystalline samples were prepared from appropriate amounts of Ag (4N), Ga(4N), Te(4N) elements. The mixture was melted in sealed quartz ampoules at 1243 K for 6 h and annealed at 893 K for 72 h, and then made into fine powder by ball milling.

### References

1. R. Deng, X. Su, S. Hao, Z. Zheng, M. Zhang, H. Xie, W. Liu, Y. Yan, C. Wolverton, C. Uher, M. G. Kanatzidis and X. Tang, *Energy Environ. Sci.*, 2018, **11**, 1520-1535.
2. Q. Zhang, G. Wu, Z. Guo, P. Sun, R. Wang, L. Chen, X. Wang, X. Tan, H. Hu, B. Yu, J. G. Noudem, G. Liu and J. Jiang, *ACS Appl. Mater. Interfaces*, 2021, **13**, 24937-24944.
3. Q. Zhang, M. Yuan, K. Pang, Y. Zhang, R. Wang, X. Tan, G. Wu, H. Hu, J. Wu, P. Sun, G. Q. Liu and J. Jiang, *Adv. Mater.*, 2023, **35**, 2300338.
4. G. Yang, L. Sang, F. F. Yun, D. R. G. Mitchell, G. Casillas, N. Ye, K. See, J. Pei, X. Wang, J. F. Li, G. J. Snyder and X. Wang, *Adv. Funct. Mater.*, 2021, **31**, 2008851.
5. D. Bessas, I. Sergueev, H. C. Wille, J. Perßon, D. Ebling and R. P. Hermann, *Physical Review B*, 2012, **86**, 224301.
6. J. Callaway and H. C. von Baeyer, *Physical Review*, 1960, **120**, 1149-1154.
7. F. Yang, T. Ikeda, G. J. Snyder and C. Dames, *J. Appl. Phys.*, 2010, **108**, 034310.
8. X. Chen, H. D. Zhou, A. Kiswandhi, I. Miotkowski, Y. P. Chen, P. A. Sharma, A. L. Lima Sharma, M. A. Hekmaty, D. Smirnov and Z. Jiang, *Appl. Phys. Lett.*, 2011, **99**, 261912.
9. E. S. Toberer, A. Zevkink and G. J. Snyder, *J. Mater. Chem.*, 2011, **21**, 15843-15852.
